# Supplementary material
Source: Springer Nature journal article supplement (https://www.springermedizin.de/resource/supplementary/12913_2013_3754_MOESM2_ESM.pdf/9532454)
Supplement: MOESM2 [file 9532454]

**Total extracted for chart review  
(n=)**

**Excluded (n=)**

- Patient deceased (n=)
- Contraindication for hypoglycemia (n=)
- Serious mental illness (bipolar or psychotic) (n=)
- Dementia or serious cognitive impairment (n=)
- Current substance abuse/dependence (n=)
- Address outside catchment area (n=)
- Incomplete contact information (n=)

**Letters Sent  
(n=)**

**Did Not Screen (n=)**

- Unable to contact through mail and/or phone (n=)
- Declined to participate (n=)

**Not Yet Completed (n=)**

- In process (n=)
- Letters recently sent (n=)

**Screening call  
(n=)**

**Excluded (n=)**

- Unable to contact (n=)
- Declined to participate (n=)
- Patient deceased (n=)
- Past or present serious mental illness (n=)
- Cognitive Impairment (n=)
- Substance abuse/dependence (n=)
- Outside Houston catchment area (n=)
- Absence of depression (n=)
- Suicidal (n=)
- Serious hearing/vision impairment (n=)

**Baseline assessment  
(n=)**

**Enrolled, but excluded before randomized (n=)**

- Unreachable at baseline (n=)
- Outside catchment area (n=)
- Patient deceased (n=)
- PHQ-9 requirement not met (n=)
- Expressed suicidal intent (n=)
- A1c level below 7.5 (n=)

**Randomized (n=)**
